# Supplementary material
Source: Springer Nature journal article supplement (https://www.springermedizin.de/resource/supplementary/12888_2012_1480_MOESM3_ESM.pdf/9480522)

**Chart 1: Patient flow; step down (SDC) versus outpatient treatment (OPC)**

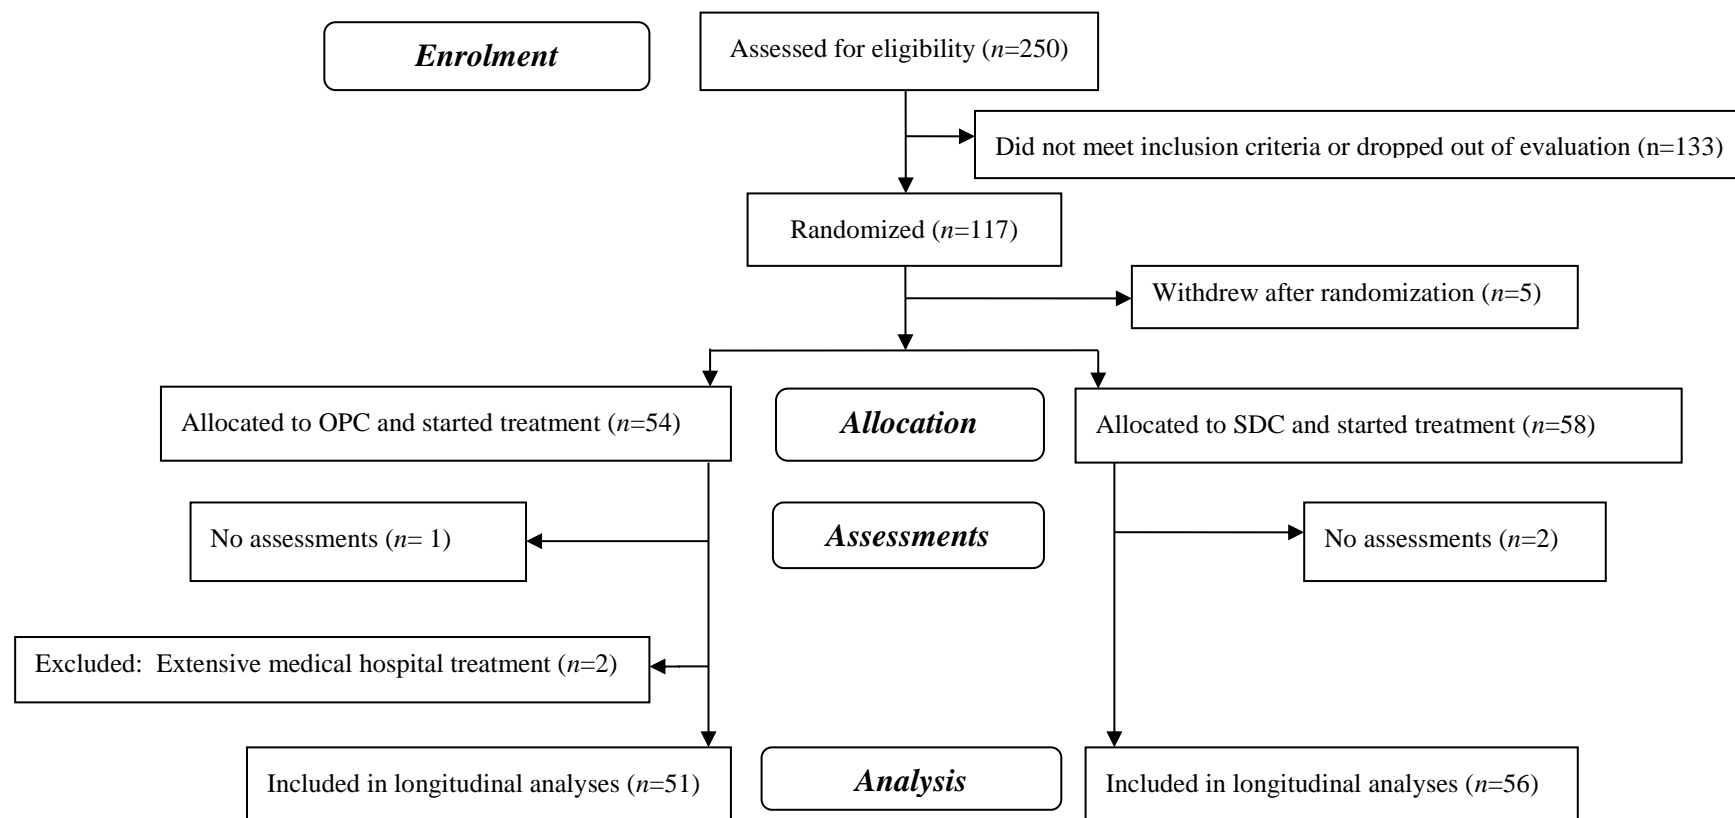

Supplement: MOESM3 [file 9480522]
